# Supplementary material for: Green-fluorescent naphthalene diimide: conducting layered hierarchical 2D nanosheets and reversible probe for detection of aromatic solvents
Source: Royal Society of Chemistry journal article supplement (doi:10.1039/c3ra41701h), 2013-01-01
Supplement: c3ra41701h.pdf [file c3ra41701h.pdf]

## **Electronic Supplementary Information**

# **Green fluorescent naphthalene diimide: conducting layered hierarchical 2D nanosheets and reversible probe for detection of aromatic solvents**

**M. Pandeewar and T. Govindaraju\***

*Bioorganic Chemistry Laboratory, New Chemistry Unit, Jawaharlal Nehru Centre for Advanced Scientific Research, Jakkur P.O., Bangalore 560064, India. Fax: +91 80 22082627; E-mail: tgraju@jncasr.ac.in*

## **Contents**

**Experimental section**

**Materials and methods**

**Synthetic procedure and characterization**

**LD spectra of 1A and 1B in aqueous solution**

**FESEM and fluorescence confocal micrographs of 1B**

**Optical micrographs of 1A**

**PXRD analysis**

**<sup>1</sup>H NMR and <sup>13</sup>C NMR spectra of 1A**

**GC-MS and HRMS spectra of 1A**

**References**

## 1. Materials and methods

**Materials:** 1,4,5,8-naphthalenetetracarboxylic acid dianhydride (NDA), *N,N*-diisopropylethylamine were obtained from Sigma-Aldrich, 1-hydroxybenzotriazole, L-alanine, D-alanine, and ethyl amine from Spectrochem Pvt. Ltd. (Mumbai, India). All other reagents and solvents were of reagent grade and used without further purification.

**Absorption Spectroscopy:** UV–vis spectra were recorded on a Perkin Elmer Model Lambda 900 spectrophotometer by using quartz cuvette of 1 mm path length.

**Fluorescence Spectroscopy:** Fluorescence spectra were recorded on a Perkin Elmer Model LS 55 spectrophotometer by using quartz cuvette of 1 mm path length. All fluorescence spectra with excitation wavelength  $\lambda_{\text{ex}} = 360$  nm.

**Circular Dichroism (CD):** CD measurements were carried out on a Jasco J-815 spectro polarimeter under nitrogen atmosphere by using quartz cuvette of 1 mm path length.

For thin film CD measurements, the samples were prepared by drop casted the aqueous solutions onto a quartz plate and dried in air followed by vacuum drying at room temperature.

**NMR Spectroscopy:**  $^1\text{H}$  and  $^{13}\text{C}$  NMR spectra were recorded on a Bruker AV-400 spectrometer with chemical shifts reported as ppm (in  $\text{CDCl}_3$  with tetramethylsilane as internal standard).

**Mass Spectrometry (MS):** Mass spectra were obtained from Shimadzu, GCMS-QP 2010 plus Gas chromatograph mass spectrometer and HRMS on Agilent Technologies 6538 UHD Accurate-Mass Q-TOF LC/MS spectrometer.

**Field Emission Scanning Electron Microscopy (FESEM):** FESEM images were acquired with a FEI Nova nanoSEM-600 equipped with a field-emission gun operating at 15 kV. The samples

were prepared by drop casted the aqueous solutions onto a Si (111) substrate and dried in air followed by vacuum drying at room temperature.

**Atomic Force Microscopy (AFM):** AFM images were acquired under ambient conditions using an Innova (Veeco) atomic force microscope in dynamic force (tapping) mode. The samples were prepared by drop casted the aqueous solutions onto a Si (111) substrate and dried in air followed by vacuum drying at room temperature. AFM section analysis was done offline.

**Fluorescence confocal microscopy:** Fluorescence confocal microscopy images were obtained from LSM 510 META-Carl Zeiss. A two-photon laser was employed to excite the self-assembled **1a** and **1b** nanosheets. The LSM image examiner was utilized for processing the images.

**Powder X-ray Diffraction (PXRD):** PXRD patterns were recorded with a Rigaku-99 (Miniflex) diffractometer using Cu K $\alpha$  radiation ( $\lambda=1.5406$  Å). The samples were prepared by drop casted the aqueous solutions onto a glass slide and allowed to dry in air followed by vacuum drying at room temperature. The diffraction peaks were indexed with the TREOR 90 program.<sup>1</sup>

**Scanning tunnelling microscopy (STM):** STM measurements were performed on a Bruker diInnova scanning probe microscope. The samples were prepared by drop casting the aqueous solution of **1a** onto a HOPG and allowed to dry in air followed by vacuum drying at room temperature. Measurements were performed under ambient conditions using mechanically cut Pt/Ir wire from several points on the nanosheets of different topographical thickness with set point of 1 nA and a bias voltage of 500 mV was used.

## Experimental section

### General procedure for the synthesis of amino acid methylester.

Anhydrous methanol (50 mL) was placed into a 100 mL two necked round-bottom flask, fitted with a reflux condenser and an additional dropping funnel and cooled to ice temperature. Acetyl chloride (3 mL) was added drop-wise through the dropping funnel. After 15 min, alanine (6.9 g, 18.16 mmol) was added, and the reaction mixture was refluxed overnight at 70 °C. The reaction mixture was dried in vacuo to obtain alanine methylester hydrochloride in quantitative yield and used for further reaction without purification.

### General procedure for the Synthesis of 1A and 1B.<sup>2</sup>

1,4,5,8-Naphthalenetetracarboxylic dianhydride (NDA) (0.5 g, 1.86 mmol) was suspended in 450 mL of isopropanol.  $\alpha$ -Alanine methylester (0.26 g, 1.86 mmol) and ethylamine (0.1 mL, 1.86 mmol) were added to the mixture, followed by *N,N*-diisopropylethylamine (6.4 mL, 37 mmol). The mixture was allowed to reflux for 24 h. After cooling to room temperature, the resulting precipitate was filtered and washed with water. The organic layer was separated, dried under vacuo and the residue was purified by column chromatography (CH<sub>2</sub>Cl<sub>2</sub>/ MeOH: 10/1).

**Characterization data for 1A.** Yield 58 %. <sup>1</sup>H NMR (CDCl<sub>3</sub>, 400 MHz)  $\delta_{\text{H}}$  8.77 (4H, d), 5.76 (1H, q), 4.27 (2H, q), 3.75 (3H, s), 1.72 (3H, dd), 1.36 (3H, t); <sup>13</sup>C NMR (CDCl<sub>3</sub>, 400 MHz)  $\delta_{\text{C}}$  170.3, 162.5, 162.3, 131.3, 130.9, 126.9, 126.7, 126.6, 126.3, 52.6, 49.6, 36.1, 14.8, 13.3.  
HRMS: 381.1063 [M+H]<sup>+</sup>, calcd. 381.1087 for C<sub>20</sub>H<sub>17</sub>N<sub>2</sub>O<sub>6</sub>. GCMS: 380 [M]<sup>+</sup>, calcd. 380.3 for C<sub>20</sub>H<sub>16</sub>N<sub>2</sub>O<sub>6</sub>.

**Characterization data for 1B.** Yield 58 %. <sup>1</sup>H NMR (CDCl<sub>3</sub>, 400 MHz)  $\delta_{\text{H}}$  8.76 (4H, d), 5.76 (1H, q), 4.27 (2H, q), 3.75 (3H, s), 1.72 (3H, dd), 1.36 (3H, dt); <sup>13</sup>C NMR (CDCl<sub>3</sub>, 400 MHz)  $\delta_{\text{C}}$

170.4, 162.8, 162.6, 131.4, 130.9, 126.8, 126.7, 126.4, 126.3, 52.7, 49.7, 36.2, 14.9, 13.4.

HRMS: 381.1058 [M+H]<sup>+</sup>, calcd. 381.1087 for C<sub>20</sub>H<sub>17</sub>N<sub>2</sub>O<sub>6</sub>. GCMS: 380 [M]<sup>+</sup>, calcd. 380.3 for

C<sub>20</sub>H<sub>16</sub>N<sub>2</sub>O<sub>6</sub>.

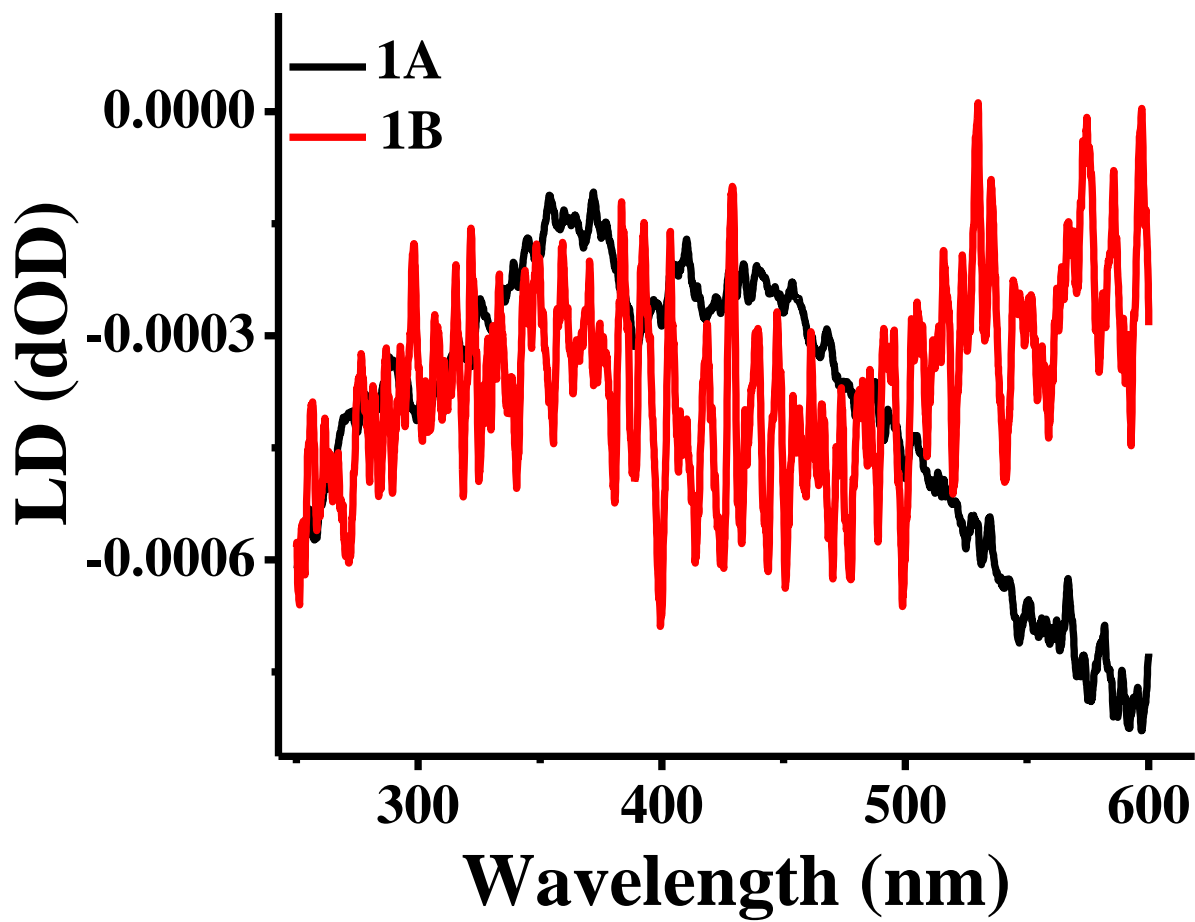

**Fig. S1** Linear dichroism (LD) spectra of **1A** and **1B** in aqueous solution (no LD artifacts was observed).

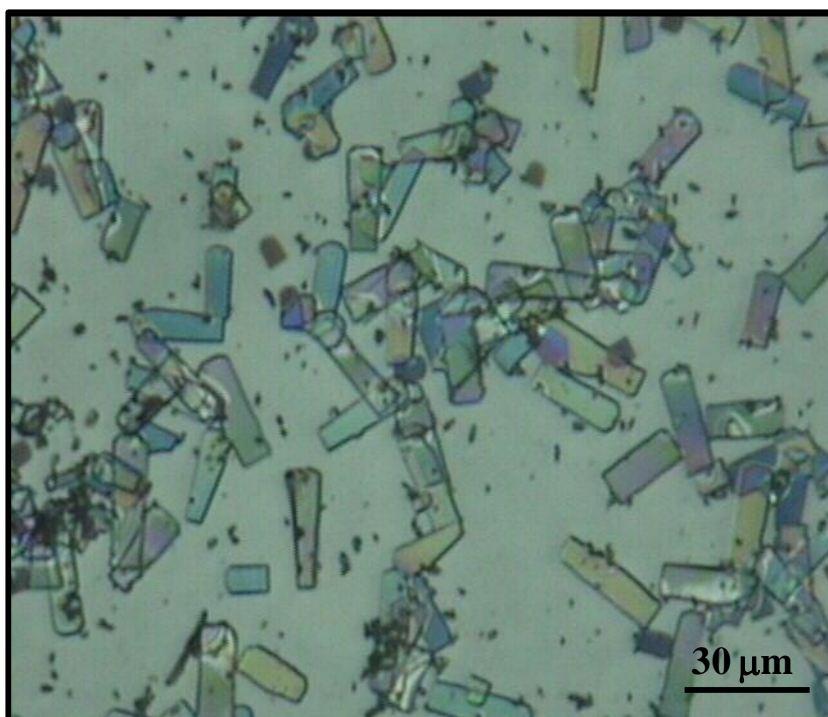

**Fig. S2** Optical image of nanosheets of **1A** (aqueous solution drop-casted on Si (111) substrate).

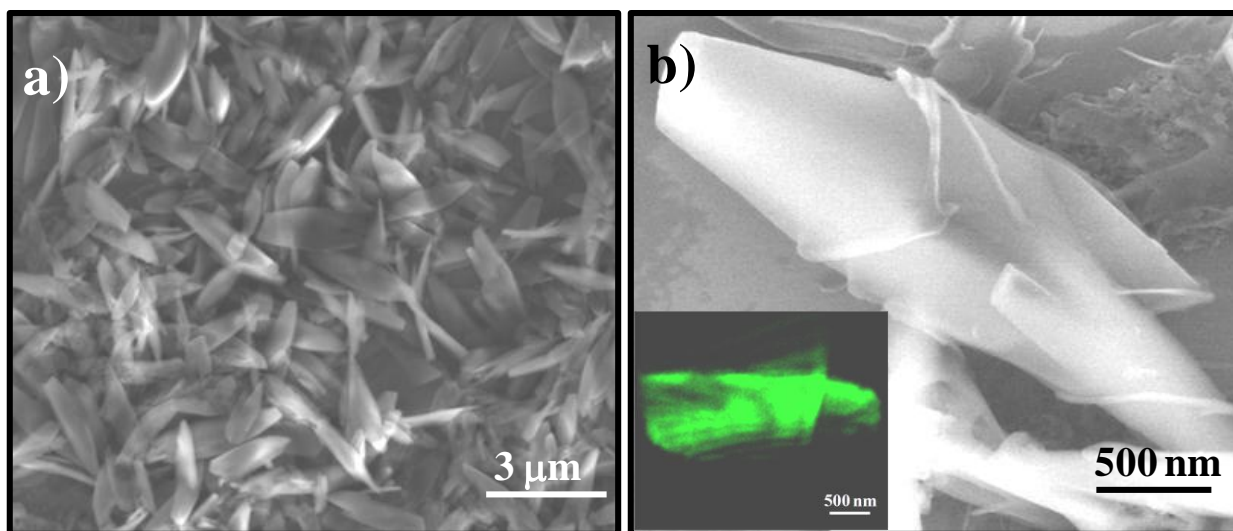

**Fig. S3** (a) FESEM images of folded nanosheets of **1B**. (b) High resolution FESEM image of individual folded nanosheet of **1B**, inset: fluorescence confocal micrograph of folded nanosheet of **1B**.



### Indexing result of the powder pattern of 1A<sup>3</sup> MONOCLINIC SYSTEM

$a=20.0759 \text{ \AA}$ ,  $b=6.4481 \text{ \AA}$ ,  $c=18.8193 \text{ \AA}$

$\alpha=90.000$ ,  $\beta=104.473$ ,  $\gamma=90.000$ , VOLUME=2358.89

| H  | K | L | SST-OBS | SST-CALC | DELTA     | 2TH-OBS | 2TH-CALC | D-OBS   | FREE |
|----|---|---|---------|----------|-----------|---------|----------|---------|------|
| -1 | 0 | 1 | 0.00253 | 0.00252  | 1.20E-05  | 5.769   | 5.755    | 15.3072 | 0    |
| 2  | 0 | 0 |         | 0.00628  |           |         | 9.091    |         |      |
| -2 | 0 | 1 | 0.00645 | 0.00639  | 5.40E-05  | 9.211   | 9.172    | 9.5932  | 0    |
| 1  | 0 | 2 | 0.01043 | 0.01039  | 3.40E-05  | 11.722  | 11.703   | 7.5436  | 0    |
| 1  | 1 | 0 | 0.0159  | 0.01584  | 6.20E-05  | 14.489  | 14.461   | 6.1083  | 0    |
| 0  | 1 | 1 |         | 0.01606  |           |         | 14.56    |         |      |
| 0  | 0 | 3 |         | 0.01608  |           |         | 14.572   |         |      |
| 1  | 0 | 3 | 0.02012 | 0.02016  | -4.70E-05 | 16.309  | 16.328   | 5.4308  | 0    |
| 2  | 1 | 1 | 0.02393 | 0.02401  | -8.10E-05 | 17.799  | 17.829   | 4.9793  | 0    |
| 3  | 0 | 2 | 0.02635 | 0.0263   | 4.80E-05  | 18.685  | 18.668   | 4.7451  | 0    |
| 3  | 1 | 0 | 0.02839 | 0.0284   | -1.00E-05 | 19.402  | 19.405   | 4.5714  | 0    |
| 0  | 0 | 4 |         | 0.02859  |           |         | 19.47    |         |      |
| 4  | 0 | 1 |         | 0.03026  |           |         | 20.036   |         |      |
| 0  | 1 | 3 | 0.03032 | 0.03035  | -3.50E-05 | 20.055  | 20.067   | 4.4239  | 0    |
|    |   |   | 0.03533 |          |           | 21.669  |          | 4.098   |      |
| 3  | 0 | 3 |         | 0.03775  |           |         | 22.408   |         |      |
| -4 | 1 | 1 | 0.03786 | 0.03783  | 2.80E-05  | 22.44   | 22.432   | 3.9588  | 0    |
| -5 | 0 | 2 |         | 0.03803  |           |         | 22.491   |         |      |
| -4 | 1 | 2 | 0.03983 | 0.03984  | -1.30E-05 | 23.025  | 23.028   | 3.8596  | 0    |
| -2 | 1 | 4 | 0.04248 | 0.04244  | 3.90E-05  | 23.79   | 23.779   | 3.7372  | 0    |
| -2 | 0 | 5 |         | 0.04258  |           |         | 23.818   |         |      |

|    |   |   |         |         |         |        |        |        |   |
|----|---|---|---------|---------|---------|--------|--------|--------|---|
|    |   |   | 0.04834 |         |         | 25.401 |        | 3.5036 | 0 |
|    |   |   |         |         | -1.15E- |        |        |        |   |
| -5 | 0 | 4 | 0.05099 | 0.0511  | 04      | 26.1   | 26.13  | 3.4114 | 0 |
| -5 | 1 | 1 |         | 0.05113 |         |        | 26.137 |        |   |
| 4  | 0 | 3 |         | 0.05126 |         |        | 26.17  |        |   |
| -4 | 1 | 4 |         | 0.05459 |         |        | 27.023 |        |   |
|    |   |   |         |         | -3.60E- |        |        |        |   |
| 5  | 0 | 2 | 0.05474 | 0.05478 | 05      | 27.062 | 27.071 | 3.2923 | 0 |
| 2  | 0 | 5 | 0.05933 | 28.196  |         |        |        |        |   |
|    |   |   |         |         | -3.90E- |        |        |        |   |
| 5  | 1 | 1 | 0.05946 | 0.0595  | 05      | 28.228 | 28.237 | 3.1589 | 0 |
| -1 | 2 | 1 | 0.0596  | 28.262  |         |        |        |        |   |
|    |   |   |         |         | -9.60E- |        |        |        |   |
| -1 | 2 | 2 | 0.06403 | 0.06413 | 05      | 29.315 | 29.338 | 3.0441 | 0 |
| 0  | 2 | 2 |         | 0.06423 |         |        | 29.362 |        |   |
| 0  | 0 | 6 |         | 0.06433 |         |        | 29.386 |        |   |
|    |   |   |         |         | 1.00E-  |        |        |        |   |
| 5  | 1 | 2 | 0.06905 | 0.06905 | 06      | 30.47  | 30.469 | 2.9314 | 0 |
| -4 | 0 | 6 | 0.06936 | 30.539  |         |        |        |        |   |
|    |   |   |         |         | 2.30E-  |        |        |        |   |
| -2 | 2 | 3 | 0.07445 | 0.07442 | 05      | 31.668 | 31.663 | 2.8232 | 0 |
| -2 | 1 | 6 | 0.07484 | 31.753  |         |        |        |        |   |
|    |   |   |         |         | -2.32E- |        |        |        |   |
| -7 | 0 | 4 | 0.08186 | 0.08209 | 04      | 33.25  | 33.299 | 2.6923 | 0 |
| -2 | 0 | 7 |         | 0.08212 |         |        | 33.305 |        |   |
| 5  | 1 | 3 |         | 0.08217 |         |        | 33.316 |        |   |
| 4  | 2 | 0 |         | 0.08221 |         |        | 33.323 |        |   |

**NUMBER OF OBS. LINES = 21**

**NUMBER OF CALC. LINES = 39**

**MEAN ABSOLUTE DISCREPANCIES**

**<Q> = .0000430**

**<DELTA(2-THETA)> = .015652**

## Indexing result of the powder pattern of 1B<sup>3</sup>

MONOCLINIC SYSTEM

$a=15.5447 \text{ \AA}$ ,  $b=11.6472 \text{ \AA}$ ,  $c=14.940590 \text{ \AA}$

$\alpha=90.000$ ,  $\beta=102.270$ ,  $\gamma=90.000$ , VOLUME=2643.23

| H  | K | L | SST-OBS | SST-CALC | DELTA     | 2TH-OBS | 2TH-CALC | D-OBS   | FREE |
|----|---|---|---------|----------|-----------|---------|----------|---------|------|
| 1  | 0 | 0 | 0.00255 | 0.00257  | -1.90E-05 | 5.792   | 5.814    | 15.2459 | 0    |
| 1  | 0 | 1 | 0.00651 | 0.00649  | 1.50E-05  | 9.254   | 9.244    | 9.5485  | 0    |
| 1  | 0 | 2 | 0.01609 | 0.01598  | 1.09E-04  | 14.575  | 14.526   | 6.0724  | 0    |
| 0  | 2 | 1 |         | 0.02028  |           |         | 16.374   |         |      |
| 1  | 1 | 2 | 0.02035 | 0.02036  | -3.00E-06 | 16.404  | 16.405   | 5.3994  | 0    |
| 1  | 2 | 1 | 0.02401 | 0.02399  | 2.50E-05  | 17.83   | 17.82    | 4.9708  | 0    |
|    |   |   | 0.02657 |          |           | 18.761  |          | 4.726   |      |
| -2 | 0 | 3 | 0.02853 | 0.02852  | 8.00E-06  | 19.447  | 19.445   | 4.5608  | 0    |
| -1 | 1 | 3 |         | 0.02859  |           |         | 19.469   |         |      |
| 0  | 2 | 2 |         | 0.02863  |           |         | 19.484   |         |      |
| 2  | 1 | 2 | 0.03041 | 0.03035  | 6.40E-05  | 20.086  | 20.064   | 4.4173  | 0    |
| -2 | 2 | 2 | 0.03442 | 0.03437  | 5.30E-05  | 21.384  | 21.368   | 4.1519  | 0    |
| -3 | 0 | 3 | 0.03798 | 0.03796  | 1.10E-05  | 22.475  | 22.472   | 3.9528  | 0    |
| -3 | 2 | 1 | 0.03997 | 0.04001  | -4.20E-05 | 23.066  | 23.078   | 3.8529  | 0    |
| 0  | 2 | 3 |         | 0.04255  |           |         | 23.809   |         |      |
| -1 | 0 | 4 | 0.04267 | 0.04256  | 1.10E-04  | 23.844  | 23.813   | 3.7288  | 0    |
| 0  | 1 | 4 | 0.04889 | 0.04892  | -2.70E-05 | 25.548  | 25.556   | 3.4838  | 0    |
| 1  | 0 | 4 | 0.05165 | 0.05166  | -1.00E-05 | 26.273  | 26.276   | 3.3893  | 0    |

|    |   |   |         |         |         |        |        |        |   |
|----|---|---|---------|---------|---------|--------|--------|--------|---|
| -4 | 0 | 3 |         | 0.05255 |         |        | 26.506 |        |   |
|    |   |   |         |         | -8.00E- |        |        |        |   |
| 4  | 1 | 1 | 0.05285 | 0.05285 | 06      | 26.581 | 26.583 | 3.3508 | 0 |
|    |   |   |         |         | -4.30E- |        |        |        |   |
| 2  | 2 | 3 | 0.05962 | 0.05966 | 05      | 28.265 | 28.276 | 3.1548 | 0 |
| -5 | 0 | 2 |         | 0.06406 |         |        | 29.321 |        |   |
| 5  | 0 | 0 |         | 0.06429 |         |        | 29.377 |        |   |
|    |   |   |         |         | -5.50E- |        |        |        |   |
| 0  | 3 | 3 | 0.06437 | 0.06442 | 05      | 29.394 | 29.407 | 3.0362 | 0 |

**NUMBER OF OBS. LINES = 17**

**NUMBER OF CALC. LINES = 23**

**MEAN ABSOLUTE DISCREPANCIES**

**<Q> = .0000376**

**<DELTA(2-THETA)> = .013438**

<sup>1</sup>H NMR spectrum (CDCl<sub>3</sub>, 400 MHz) of 1A

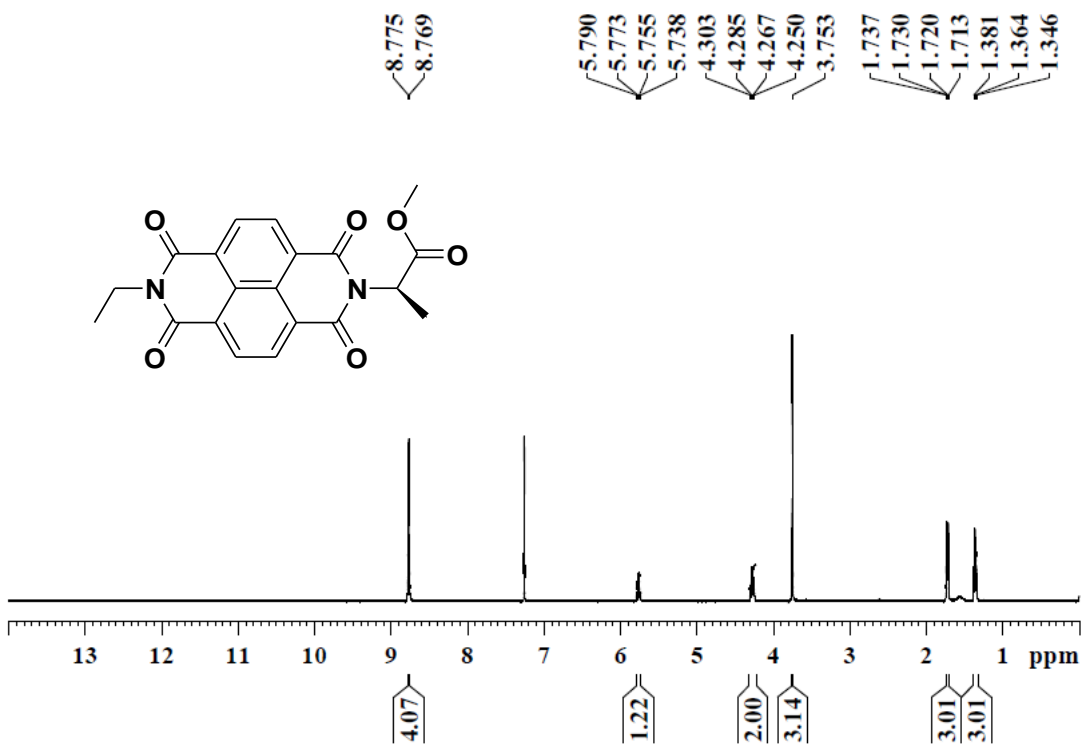

<sup>13</sup>C NMR spectrum (CDCl<sub>3</sub>, 400 MHz) of 1A

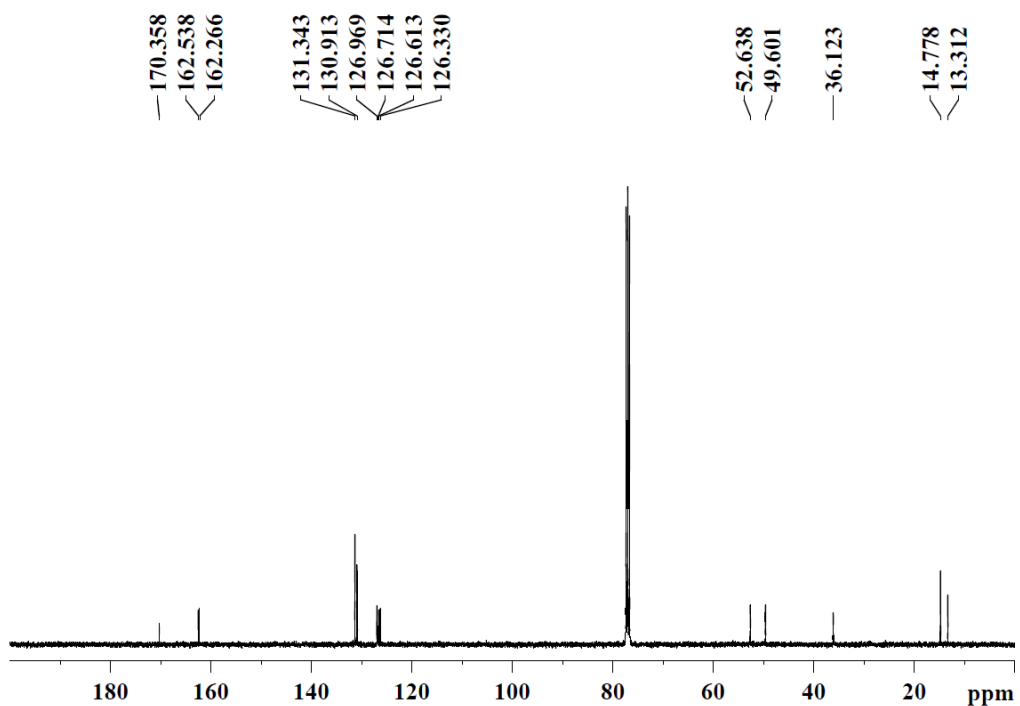

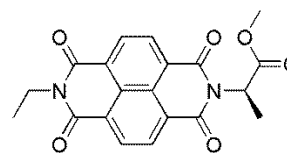

## GC-MS of 1A

$C_{20}H_{16}N_2O_6$   
Exact Mass: 380.1008

## Chromatogram

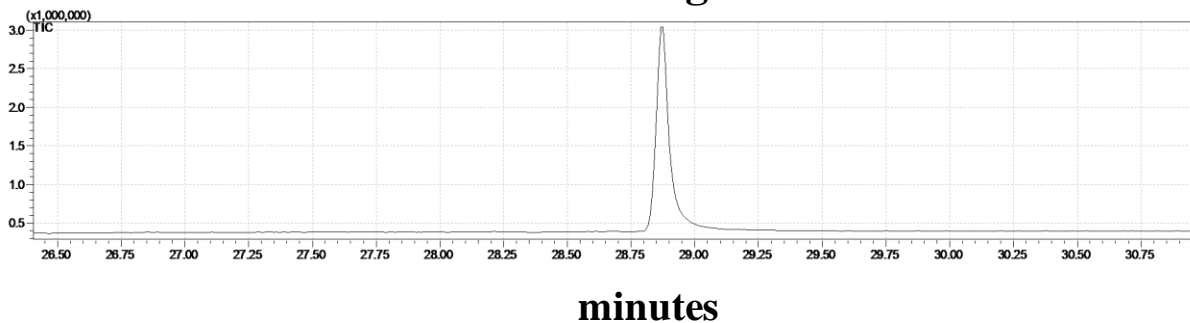

## Mass spectrum

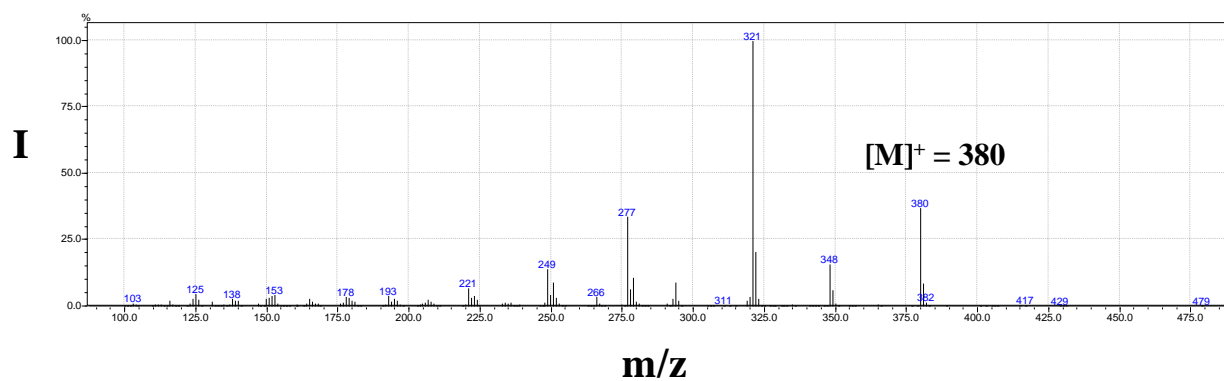

## HRMS of 1A

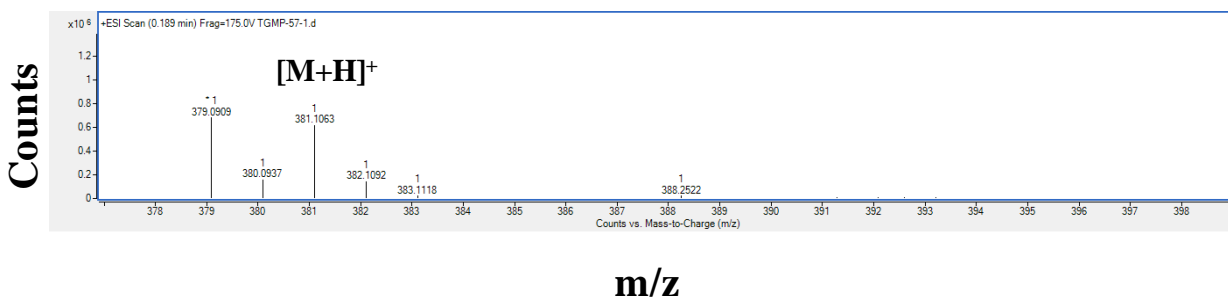

## References

- 1 P. E. Warner, L. Eriksson, M. Westdahl, *J. Appl. Cryst.*, 1985, **18**, 367-370.
- 2 R. S. Lokey, Y. Kwok, V. Guelev, C. J. Pursell, L. H. Hurley, B. L. Iverson, *J. Am. Chem. Soc.*, 1997, **119**, 7202-7210.
- 3 (a) D. Louër, M. Louër, *J. Appl. Cryst.*, 1972, **5**, 271-275; (b) A. Boultif, D. Louër, *J. Appl. Cryst.*, 1991, **24**, 987-993.
